# Supplementary material for: Fabrication of MnOx heterogeneous catalysts from wet sludge for degradation of azo dyes by activated peroxymonosulfate
Source: Royal Society of Chemistry journal article supplement (doi:10.1039/c4ra13329c), 2015-01-01
Supplement: c4ra13329c1.pdf [file c4ra13329c1.pdf]

**Supplementary Materials for**

**Fabrication of MnO<sub>x</sub> heterogeneous catalyst from wet sludge for  
degradation of azo dyes by activated peroxymonosulfate**

Lili Xu<sup>a</sup>, Wanpeng Liu<sup>a</sup>, Xingfa Li<sup>a</sup>, Sadia Rashid<sup>b</sup>, Chensi Shen<sup>b</sup>, Yuezhong Wen<sup>a\*,c</sup>

<sup>a</sup>Institute of Environmental Science, Zhejiang University, Hangzhou 310058, China

<sup>b</sup>College of Environmental Science and Engineering, Donghua University, Shanghai  
201620, China

<sup>c</sup>Zhejiang Provincial Key Laboratory of Organic Pollution Process and Control,  
Zhejiang University, Hangzhou 310058, China

---

\* Corresponding author:

Tel.: +86-571-8898-2421. Fax: +86-571-8898-2421.

E-mail address: [wenyuezhong@zju.edu.cn](mailto:wenyuezhong@zju.edu.cn) (Y.W.)

## **Text S1: Catalyst Characterization**

The elemental compositions (C, H, and N) of selected samples were determined using a Flash EA 1112 elemental analyzer (CE Instruments).

X-ray diffraction (XRD) was performed with a XRD-6000 X-ray diffractometer (Shimadzu, Japan) using Cu K $\alpha$  radiation ( $\lambda = 1.5406 \text{ \AA}$ ) from  $10^\circ$  to  $60^\circ$   $2\theta$  at a scan rate of  $6^\circ \text{ min}^{-1}$ . The degree of crystallinity was calculated from the XRD data using the Materials Data Incorporated software Jade 5.0.

Surface morphology was studied with an electron microscope. The scanning electron microscopy (SEM) micrographs were recorded using a field emission scanning electron microscope (FEI, SIRON) at a voltage of 25.0 kV. The sample surfaces were gold coated before the analysis.

X-ray absorption near-edge spectroscopy (XANES) studies were performed at BL14W1 of the Shanghai Synchrotron Irradiation Facility (SSRF) with stored electron energy of 3.5 GeV and ring currents of 200 mA. The station was operated with a Si (111) double crystal monochromator, and the measurements were performed using transmission mode. The XANES data were analyzed using the Athena program of IFEFFIT. The EXAFS function and  $\chi(E)$  was obtained by subtracting the post-edge background from the overall absorption and then normalized with respect to the edge jump step.

Soft X-ray scanning transmission X-ray microscopy (STXM) was performed at beamline BL08U1 of the Shanghai Synchrotron Radiation Facility (SSRF), China. This third-generation synchrotron storage ring was operated at 3.5 GeV, and the

STXM images have a high spatial resolution of  $<30$  nm. The materials were ultrasonically dispersed in ethanol and dropped directly onto  $\text{Si}_3\text{N}_4$  windows. After evaporation of excess ethanol, the  $\text{Si}_3\text{N}_4$  windows were fixed to the sample holder of the STXM device and observed by a soft X-ray spectromicroscopy. Single-energy images at energies of L edge and pre-edge of metal elements were scanned and recorded as raw data. Then, image differences were calculated and analyzed for mapping chemical species over the scanned areas using the dual-energy ratio contrast analysis method. The 2D spatial distribution of metal elements can be mapped quantitatively from its absorption difference at two photon energies, peak and pre-peak of metal elements absorption edge, respectively. Reference standard spectra were collected for NEXAFS analysis using the total electron yield (TEY) model.

### Supplementary Table

**Table S1.** The physicochemical characteristics of anaerobic sludge (wt %)

| Water content | Proximate analysis |       | Heavy metals (mg/g) |       |       |       |       |       |       |       |
|---------------|--------------------|-------|---------------------|-------|-------|-------|-------|-------|-------|-------|
|               | Organic carbon     | Ash   | Zn                  | Cu    | Pb    | Cd    | Cr    | Co    | Ni    | Fe    |
| 80.01         | 11.98              | 59.09 | 0.050               | 0.144 | 0.064 | 0.002 | 0.128 | 0.003 | 0.023 | 12.92 |

**Table S2** The preparation methods of catalysts and the removal of AR 73

| Samples                        | Preparation methods                                                                                                 | Removal rate (%)                      |
|--------------------------------|---------------------------------------------------------------------------------------------------------------------|---------------------------------------|
| MnO <sub>x</sub> /HCAS-120     | adding separate anaerobic sludge and MnSO <sub>4</sub> ·H <sub>2</sub> O,<br>then treating them for 12 h at 120 °C. | degradation: 98.3<br>adsorption: 2.85 |
| MnO <sub>x</sub> /HCAS-200     | adding separate anaerobic sludge and MnSO <sub>4</sub> ·H <sub>2</sub> O,<br>then treating them for 12 h at 200 °C. | degradation: 10.2<br>adsorption: 2.61 |
| MnO <sub>x</sub> /HCAS-200-120 | pretreating anaerobic sludge at 200 °C for 12 h,<br>then preparing MnO <sub>x</sub> at 120 °C for 12 h.             | degradation: 98.7<br>adsorption: 2.76 |
| HCAS-120                       | treating anaerobic sludge for 12 h at 120 °C                                                                        | adsorption: 2.97                      |
| HCAS-200                       | treating anaerobic sludge for 12 h at 200 °C                                                                        | adsorption: 2.66                      |

The initial concentration 50 mg/L, 10 mL, T=25 °C, pH 7.0, different MnO<sub>x</sub>/HCAS catalyst dosage 0.01 g, Oxone dosage 1.0 g/L.

## Supplementary Figure Captions

**Figure S1.** The chemical structures of anionic dyes.

**Figure S2.** Experimental apparatus used for hydrothermal synthesis.

**Figure S3.** XRD patterns of (a) HCAS, (b)  $\text{MnO}_2$  and (c)  $\text{MnO}_x/\text{HCAS}$  (\*, quartz;  $\circ$ , graphite structure).

**Figure S4.** Degradation of AR 73 using  $\text{MnO}_x/\text{HCAS}$  /Oxone in the presence of MeOH and TBA (Initial concentration 50 mg/L, 100 mL,  $T=25\text{ }^\circ\text{C}$ ,  $\text{pH } 7.0\pm 0.2$ , samples dosage 0.1 g, Oxone dosage 1.0 g/L, MeOH=0.3 mol/L, TBA=0.3 mol/L ).

**Figure S5.** NEXAFS spectra of (a)  $\text{Fe}_2\text{O}_3$ , (b)  $\text{Ni}_2\text{O}_3$ , (c) ZnO, (d) CuO and (e)  $\text{Cr}_2\text{O}_3$  reference at the L-edge.

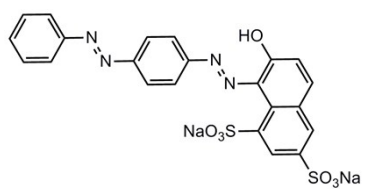

C. I. Acid Red 73

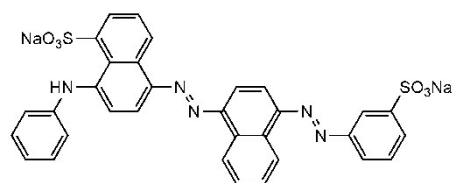

C. I. Acid Blue 113

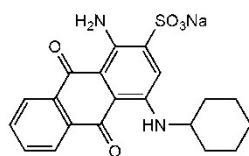

C. I. Acid Blue 62

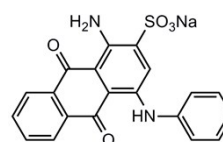

C. I. Acid Blue 25

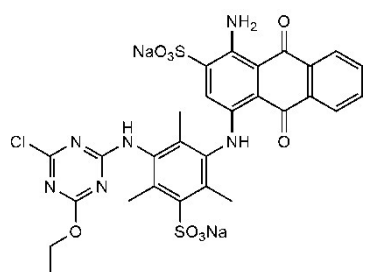

C. I. Reactive Blue 74

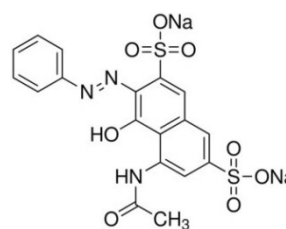

C. I. Acid Red 1

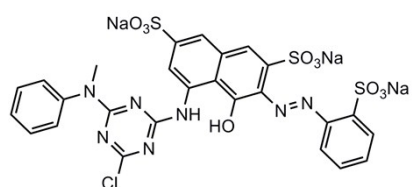

C. I. Reactive Red 24

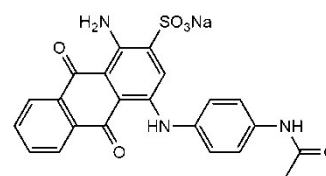

C. I. Acid Blue 40

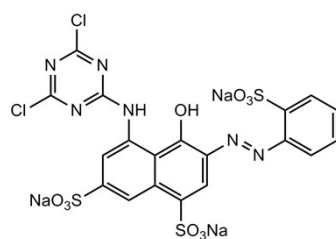

C. I. Reactive Red 11

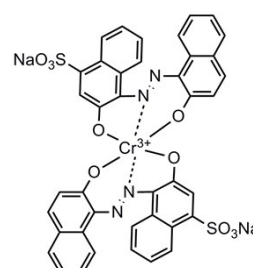

C. I. Acid Blue 193

Figure S1

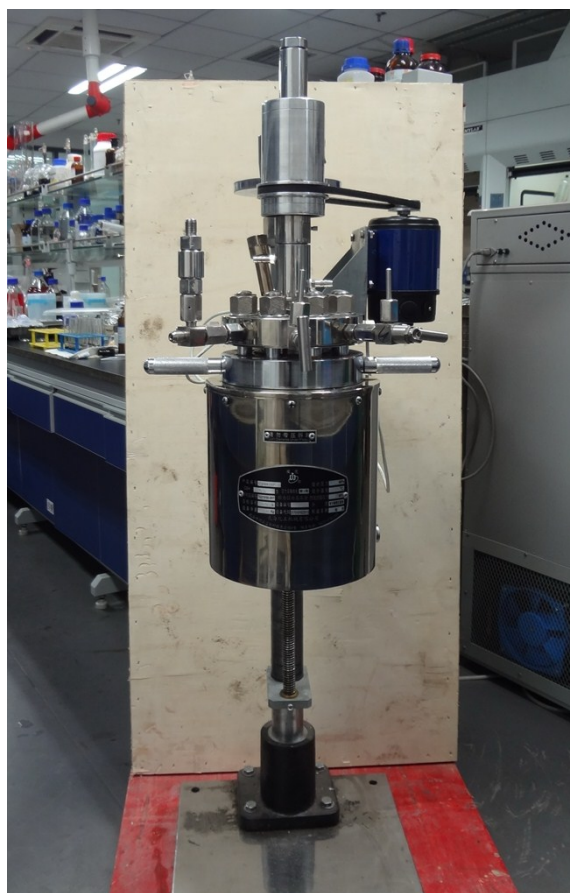

**Figure S2**



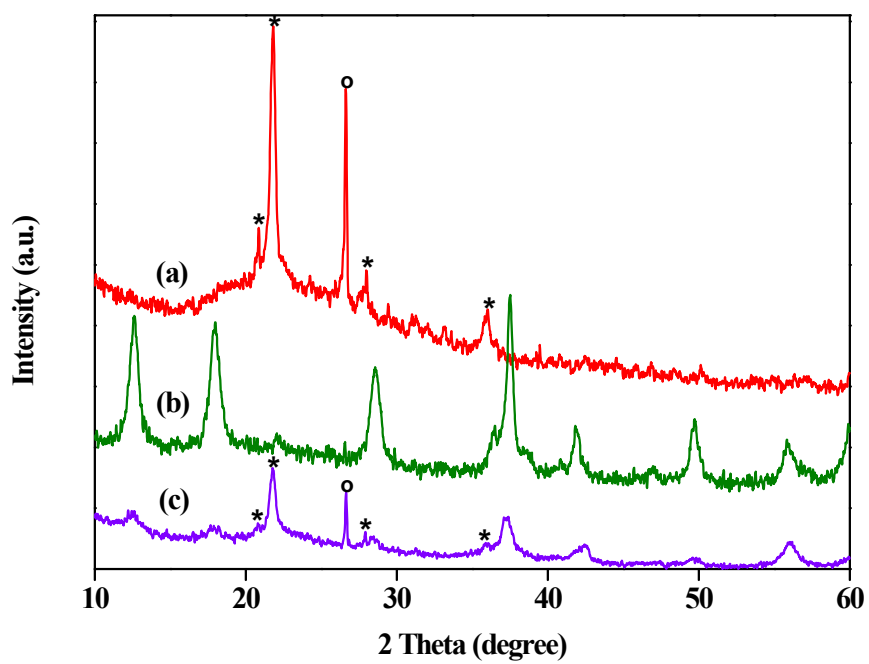

Figure S3

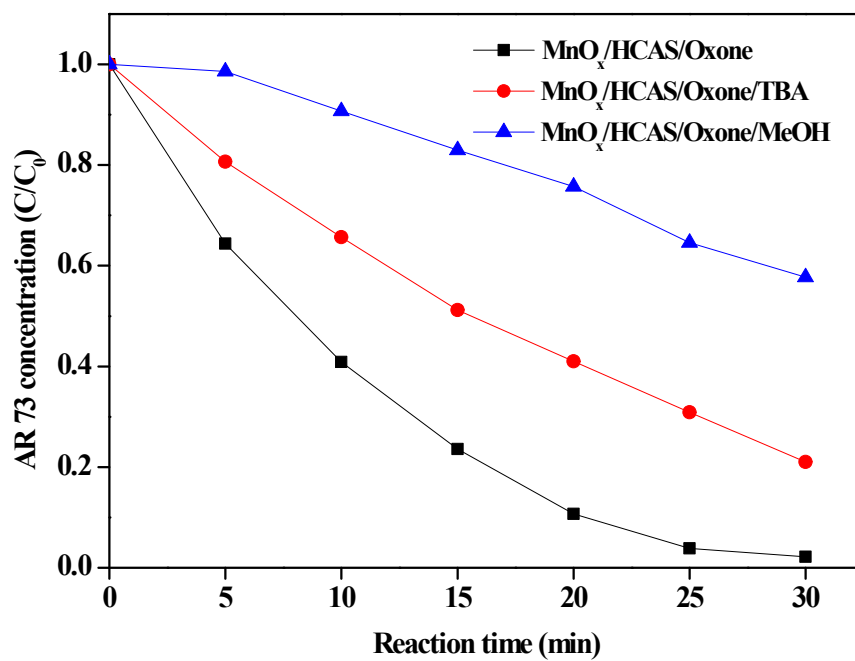

Figure S4

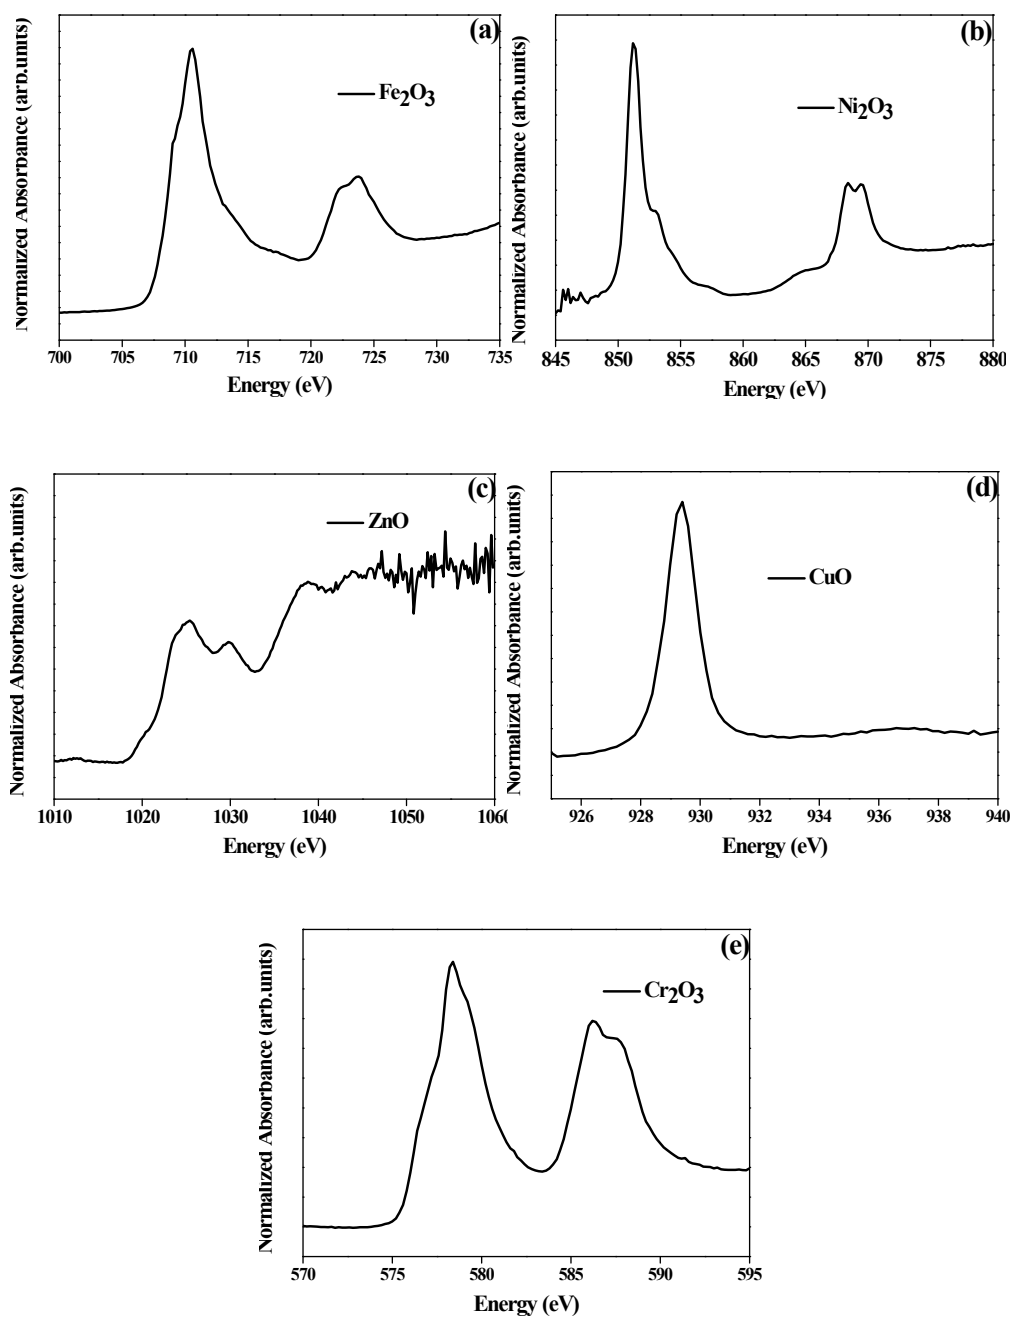

Figure S5
